# Supplementary material
Source: publisher figshare collection journal article supplement (https://tandf.figshare.com/ndownloader/files/15034406)
Supplement: Supplementary file 1 [file 15034406]

**Supporting Tables and Figures**

**Table S1. List of Primers Used for Testing Putative Transgenic Plants**

| **Primer Name** | **Sequence 5’….3’** | **No. of Bases** | **Product Size (bp)** |
| --- | --- | --- | --- |
| NPT2F | AGAACTCGTCAAGAAGGCGA | 20 | 772 |
| NPT2R | ATTGCACGCAGGTTCTCCGG | 20 |
| APS2F | ATGGCTTCAATGGCTGCCGT | 20 | 1392 |
| APS2R | TTACACCGGAACCACTTCTG | 20 |
| MS-ADFF | GCATCTGGTATGGCAGTCC | 20 | 183 |
| MS-ADFFR | GCACTCATCAGCAGGAAGG | 20 |

**Table S2. List of Various Culture Media Used for Inducing Somatic Embryogenesis in Alfalfa**

| **S No.** | **Hormonal Combination** | **Somatic Embryogenesis (%)** | **Reference** |
| --- | --- | --- | --- |
| 1 | MS+BAP+2,4-D | 90 | Fu et al. 2014 |
| 2 | MS+Kinetin+2,4-D | 50 | Tohidfar et al. 2012 |
| 3 | MS+Kinetin+2,4-D | 10 | Tian et al. 2002 |

**Figure S1. Rooting, acclimatization and field transfer of transgenic alfalfa.**

(a) *In vitro* cultures of alfalfa at various developmental stages in the growth chamber. (b) Rooted plants regenerated through embryogenesis. (c) Regenerated plants being acclimatized under high humidity in micro pots before transfer to soil. (d) Transgenic plants of alfalfa growing in pots. (e) T0 generation transgenic plants in the greenhouse.

Lane 1: 100bp marker, Lane 2: Blank; Lane 3-12: cDNA templates from putative transgenic plants.

**Figure S2. PCR of Alfalfa leaf cDNA samples with NPT2 and ADF primer pairs**

**Figure S3. Southern hybridization depicting the stable integration of the T-DNA in the alfalfa genome**
